# Supplementary material for: Synthesis, Molecular Docking and Antiplasmodial Activities of New Tetrahydro-β-Carbolines
Source: MDPI journal article supplement (doi:10.3390/ijms222413569), 2021-12-17
Supplement: s1 [file s1]

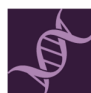

## Supplementary Materials

Supplementary Table S1.  $^1\text{H}$ - and  $^{13}\text{C}$ -NMR spectra for compounds 5,7,9–14 provided.

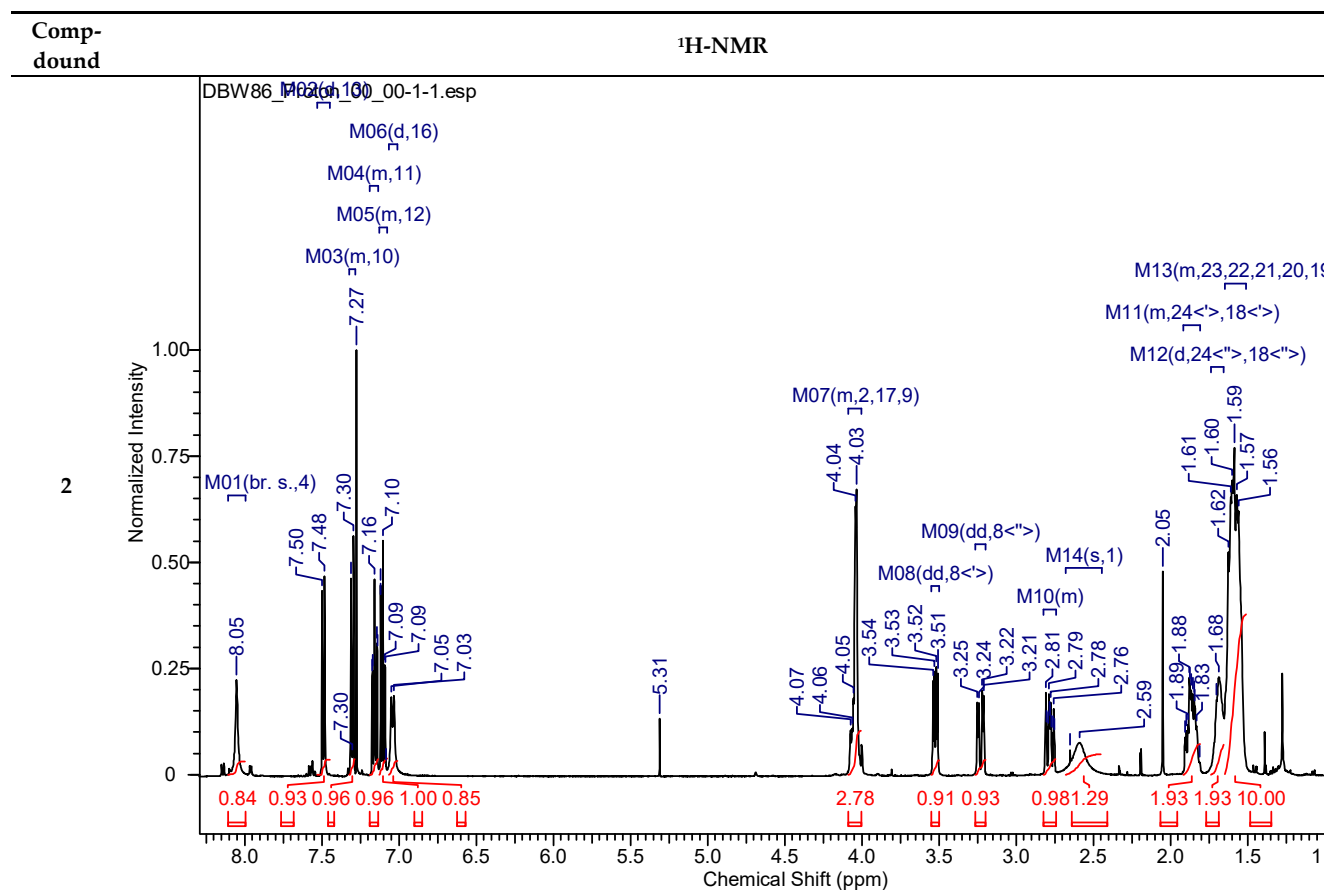

3

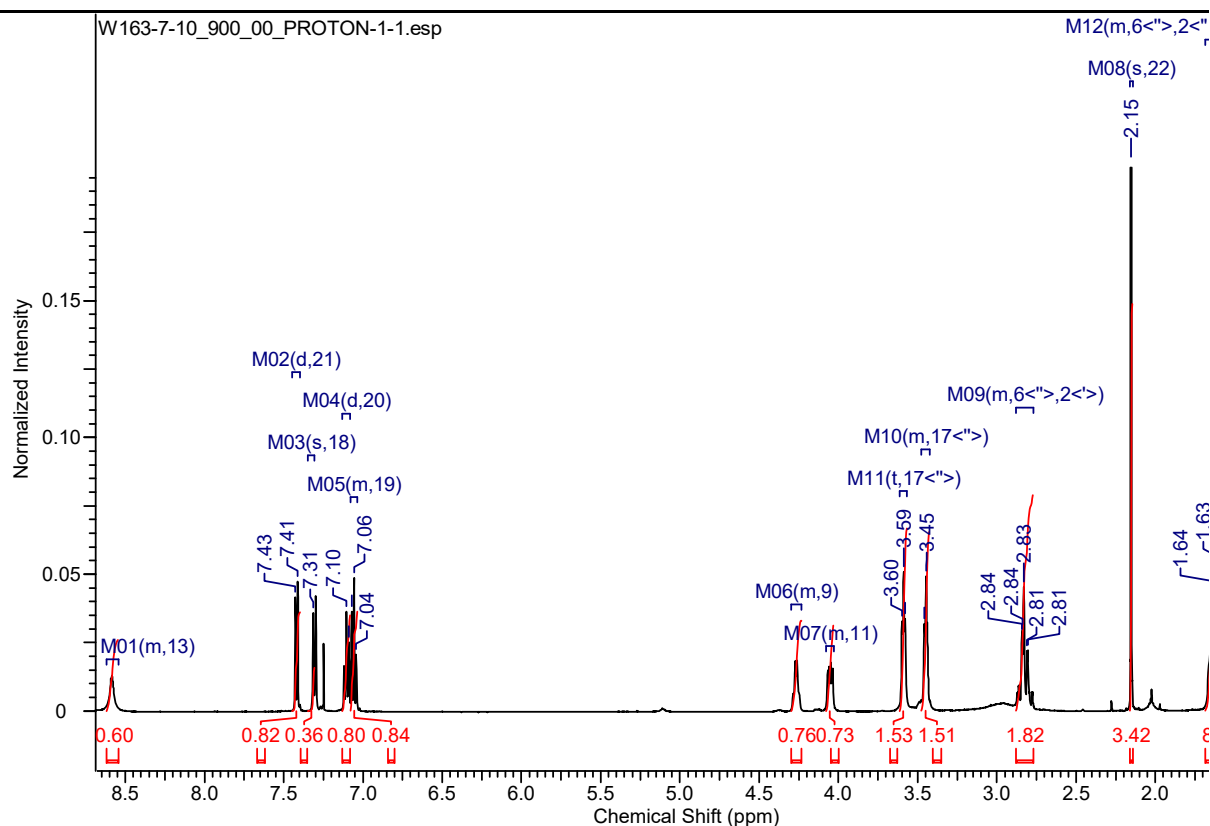

4

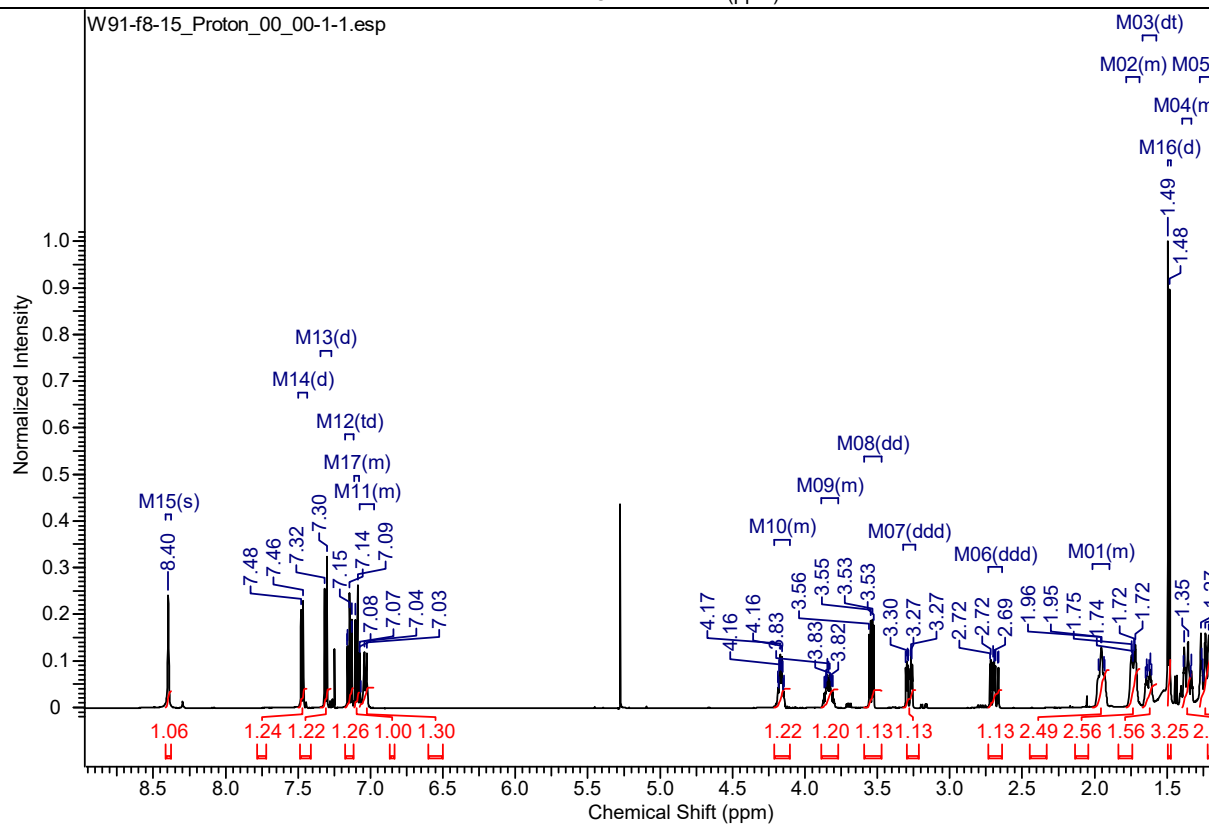

5

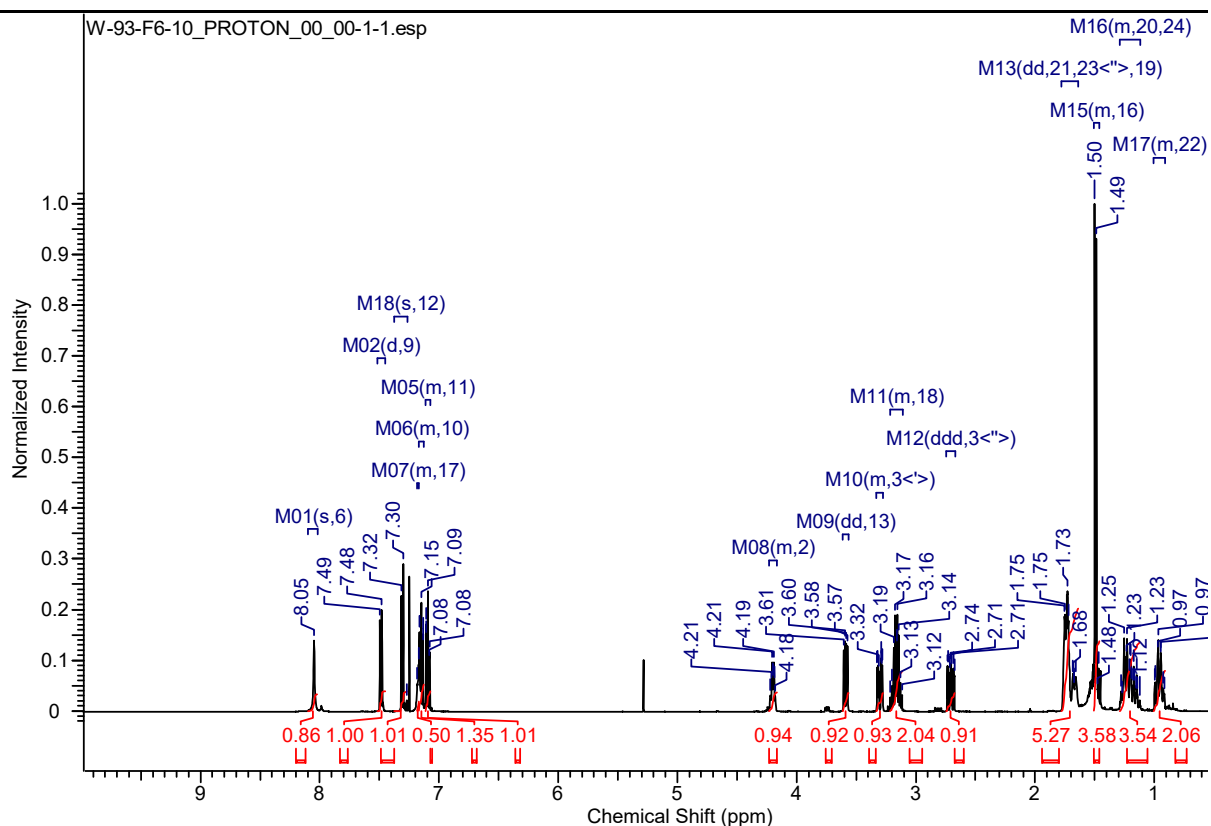

6

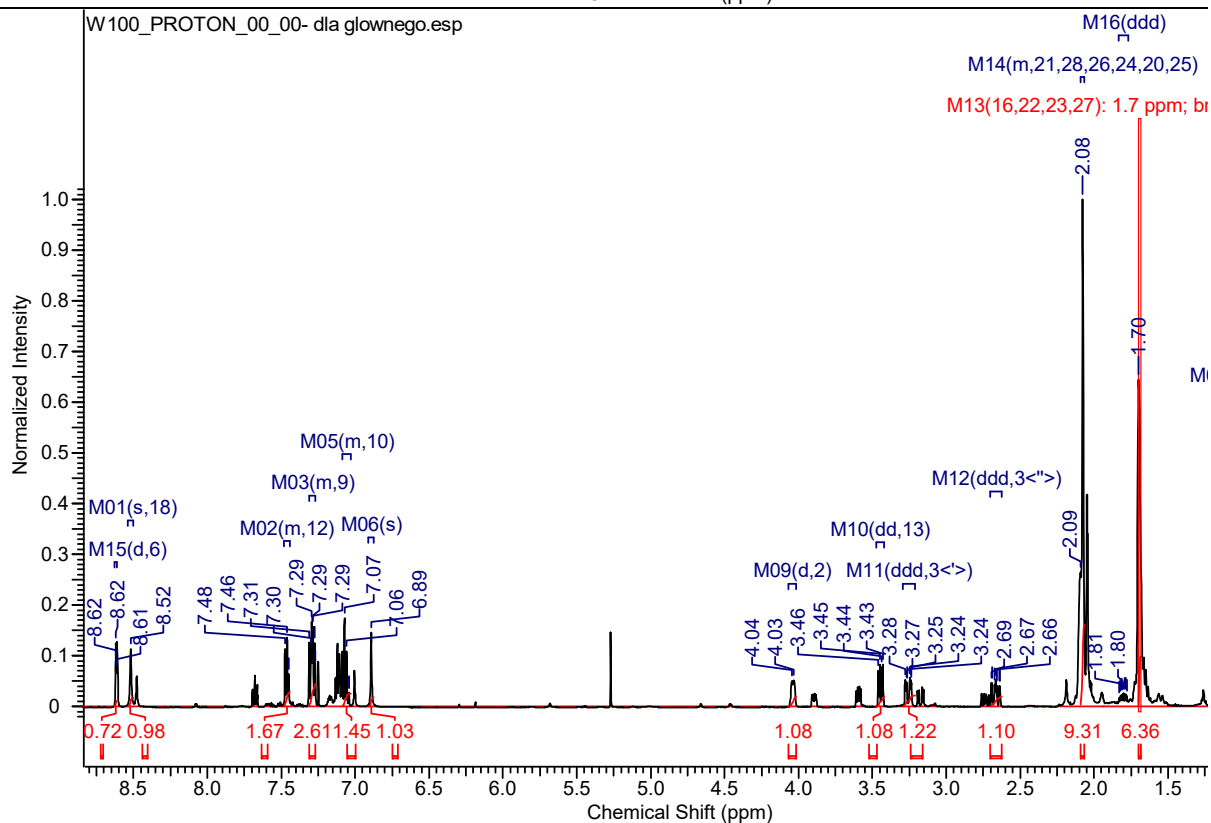

7

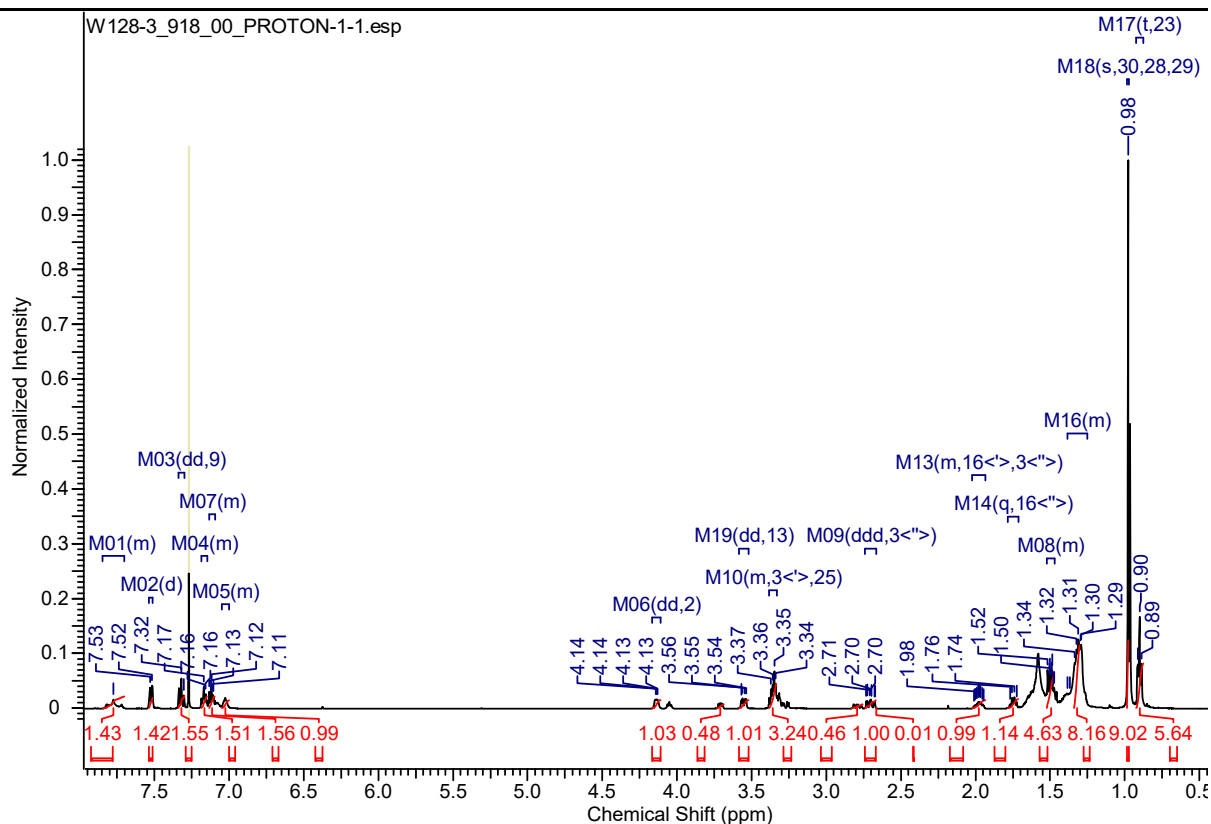

8

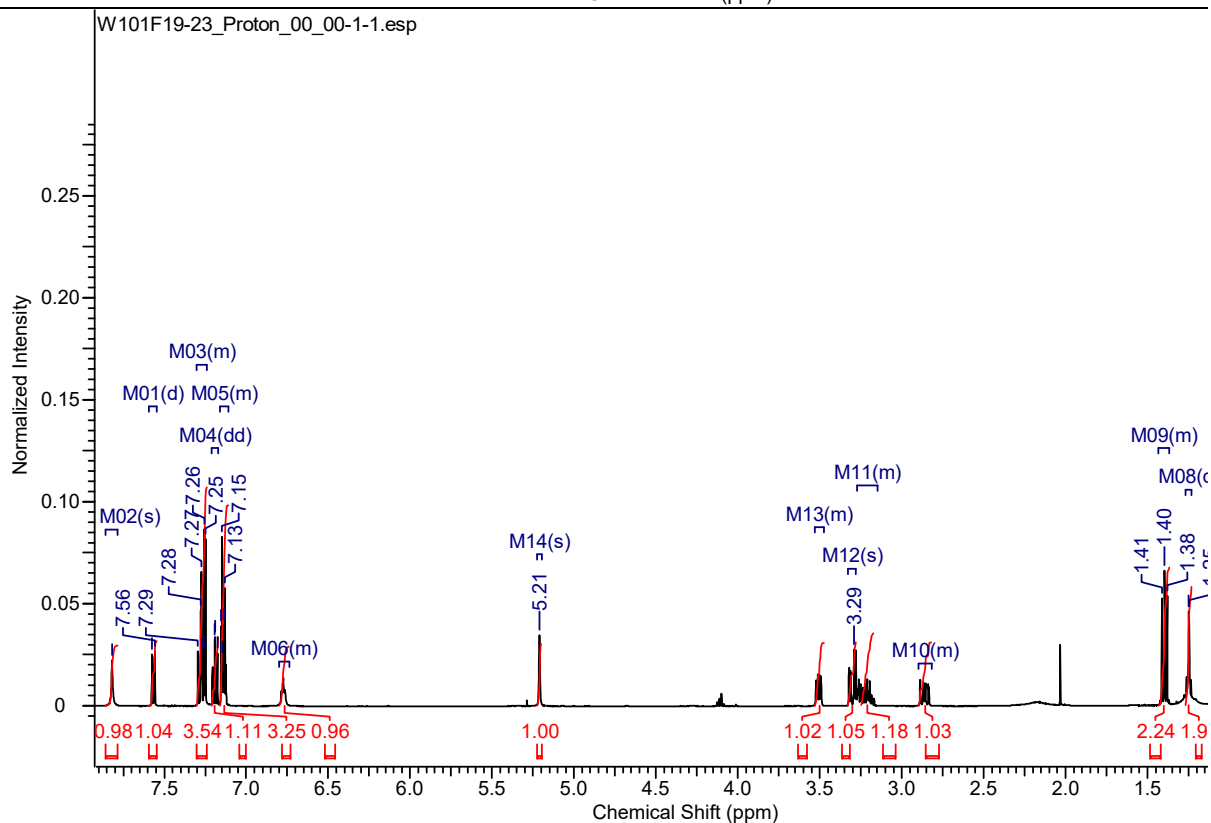

9

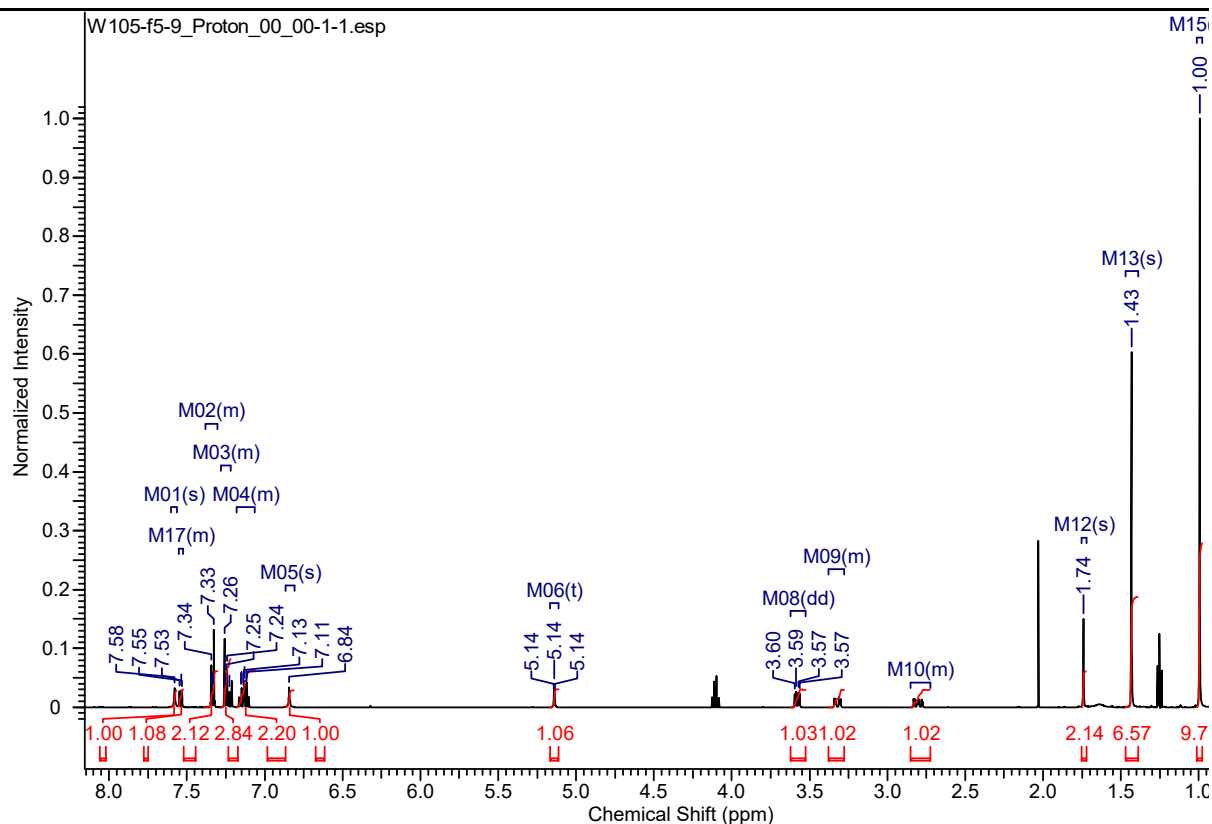

10

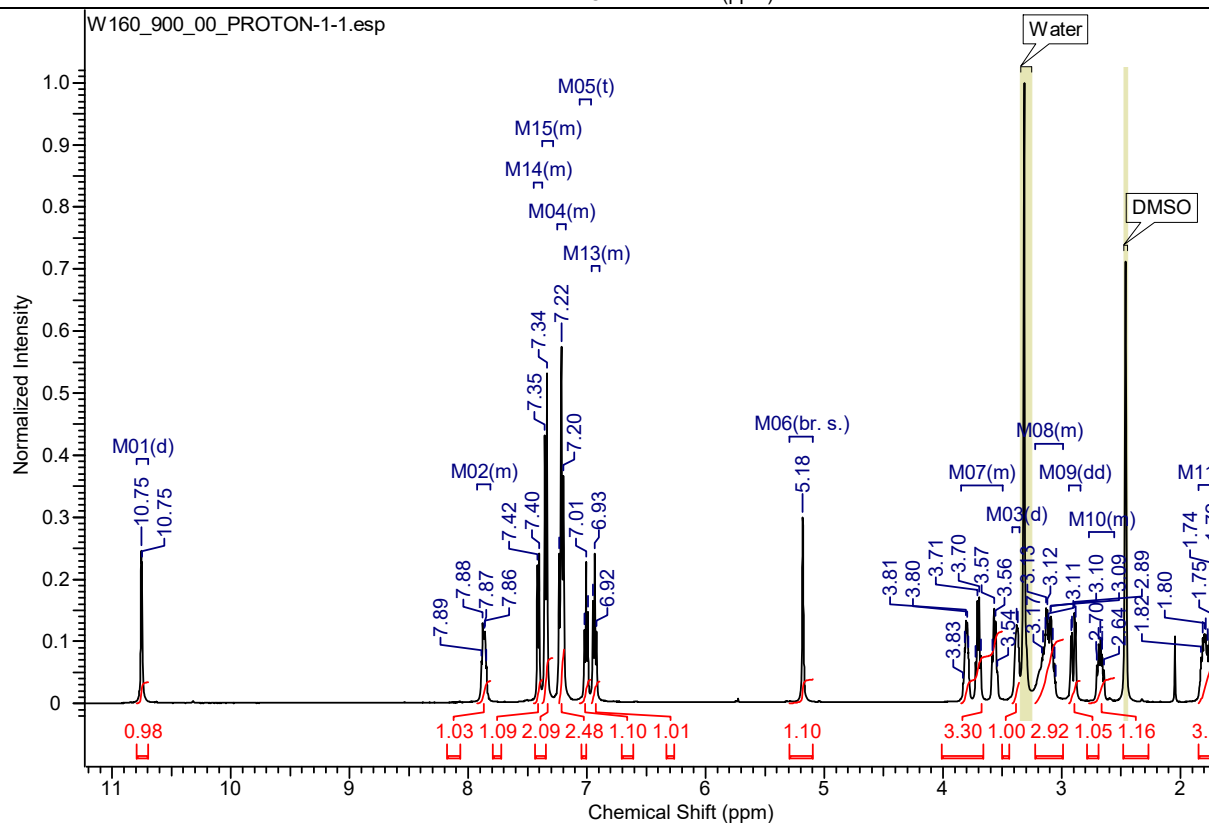



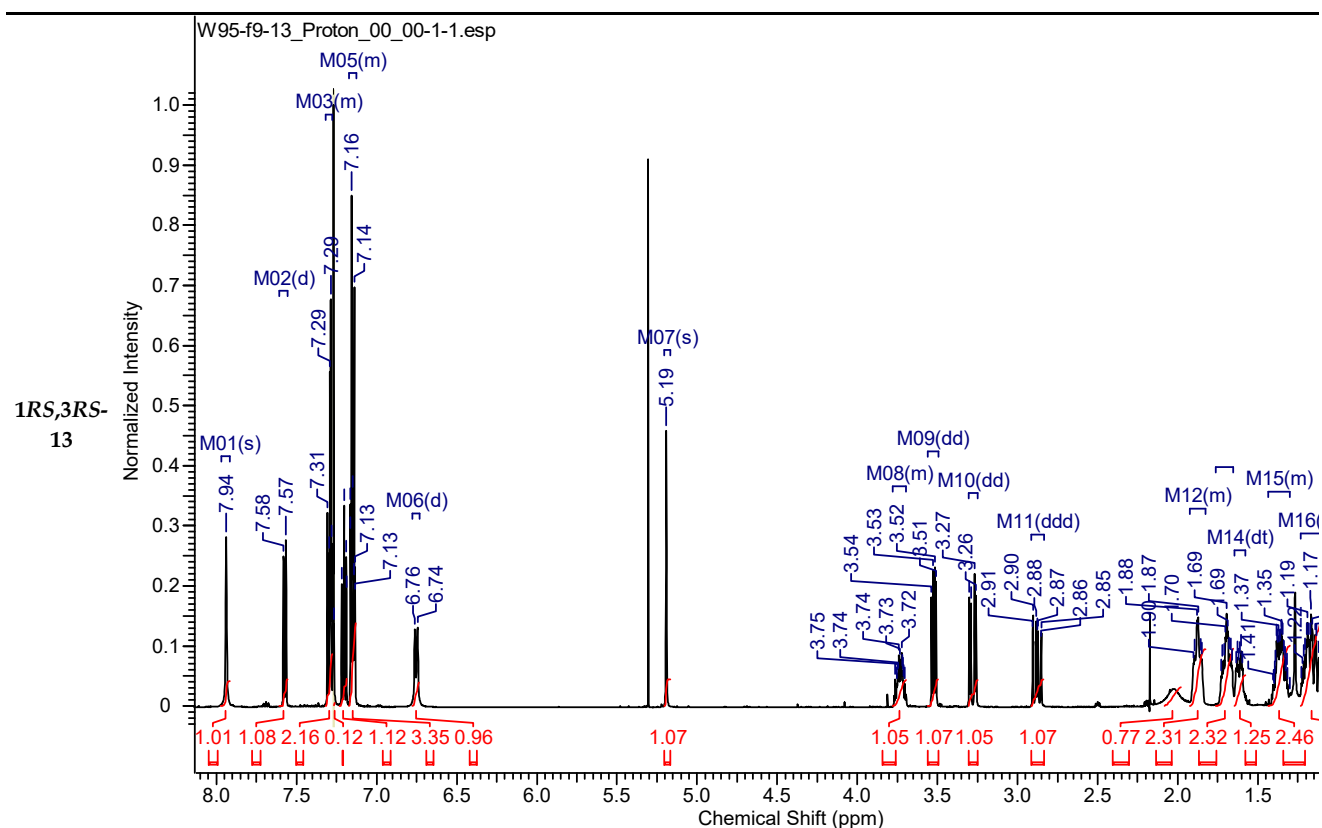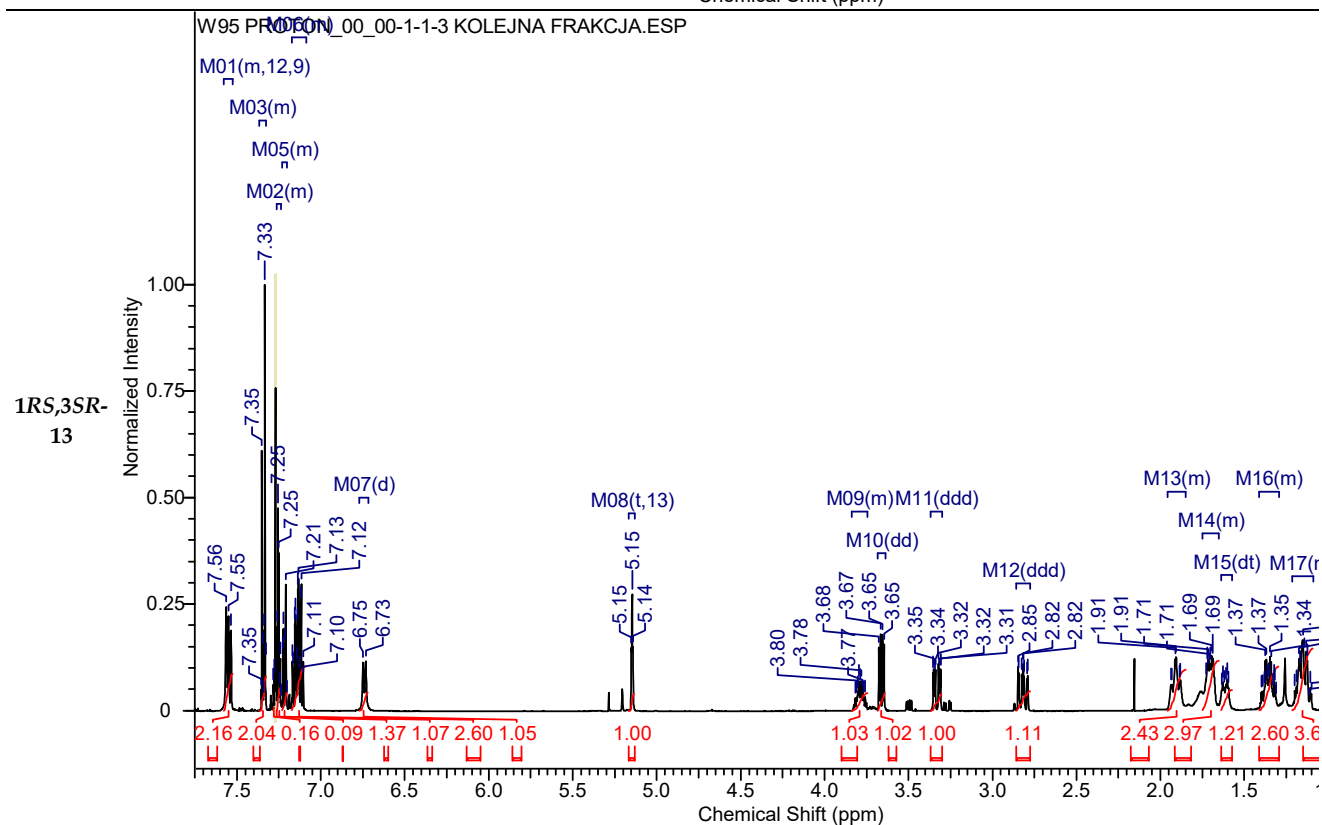

14

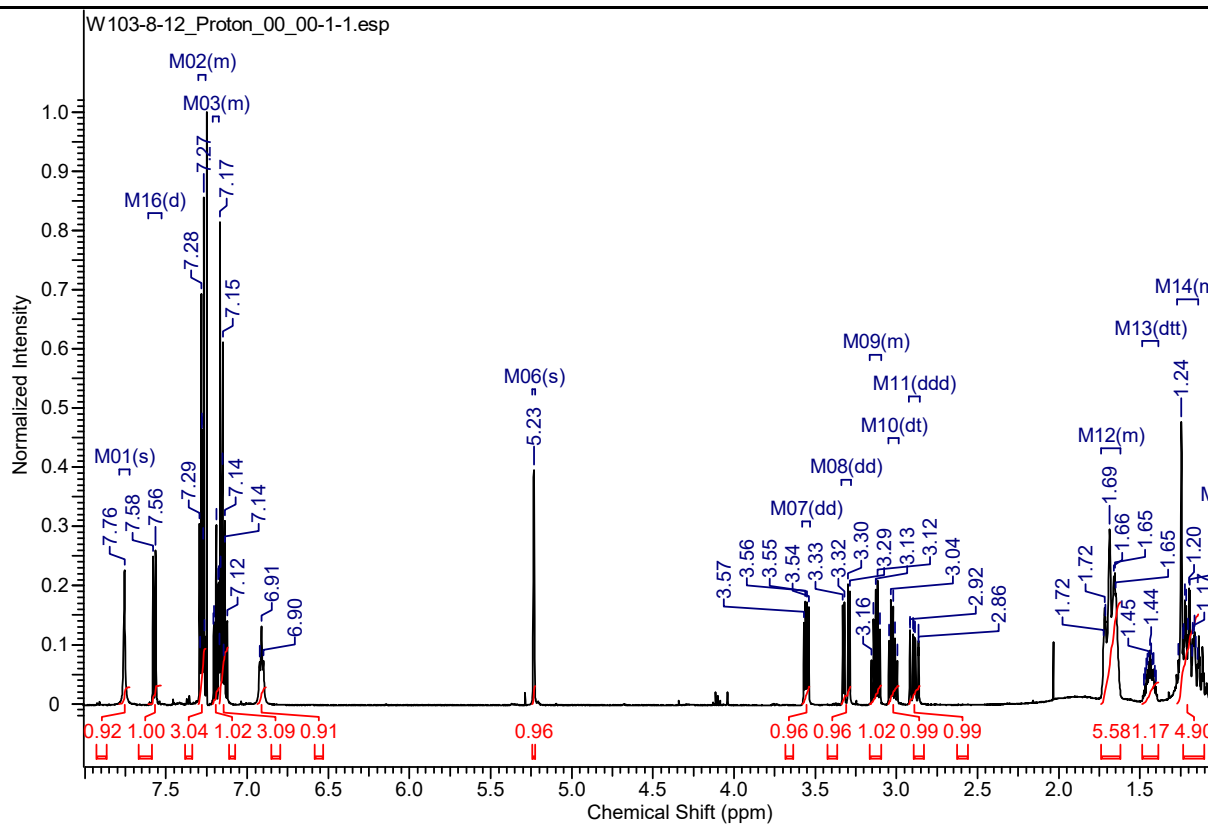

2

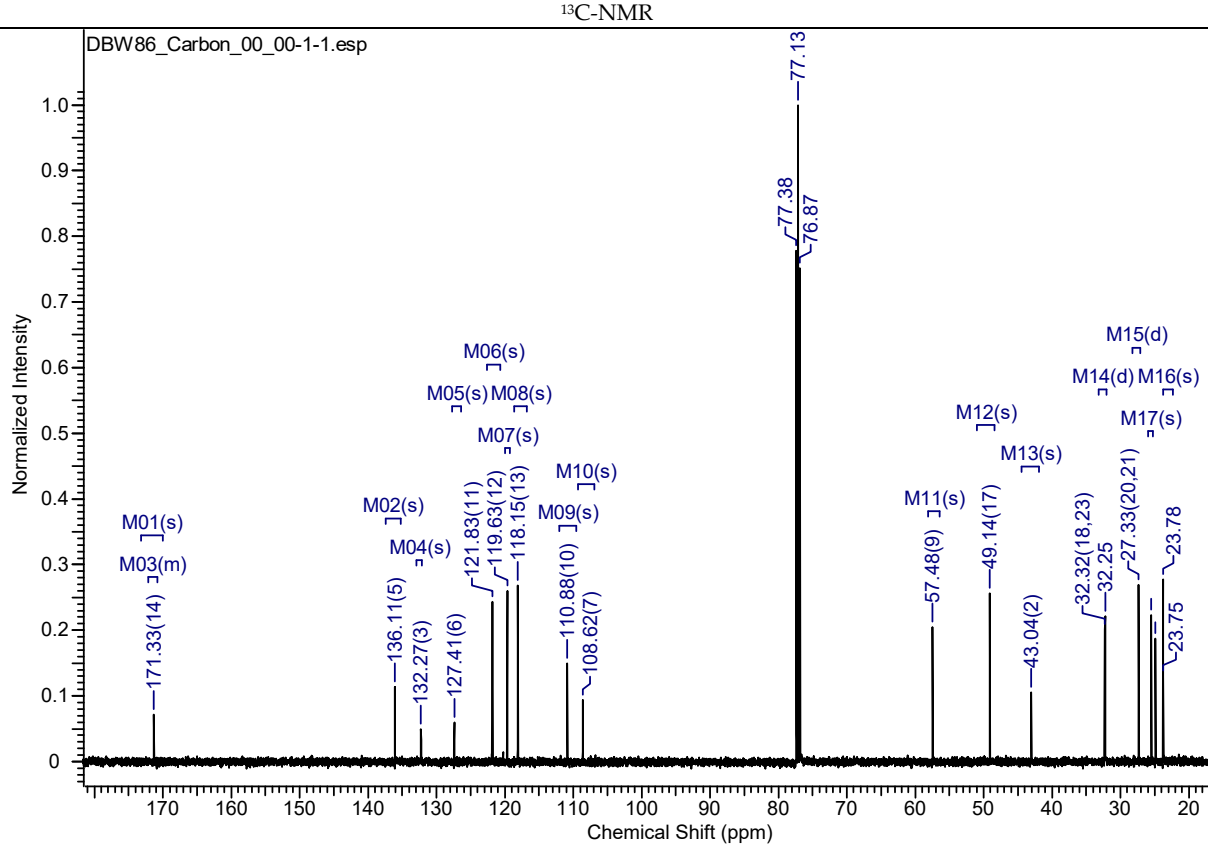



7

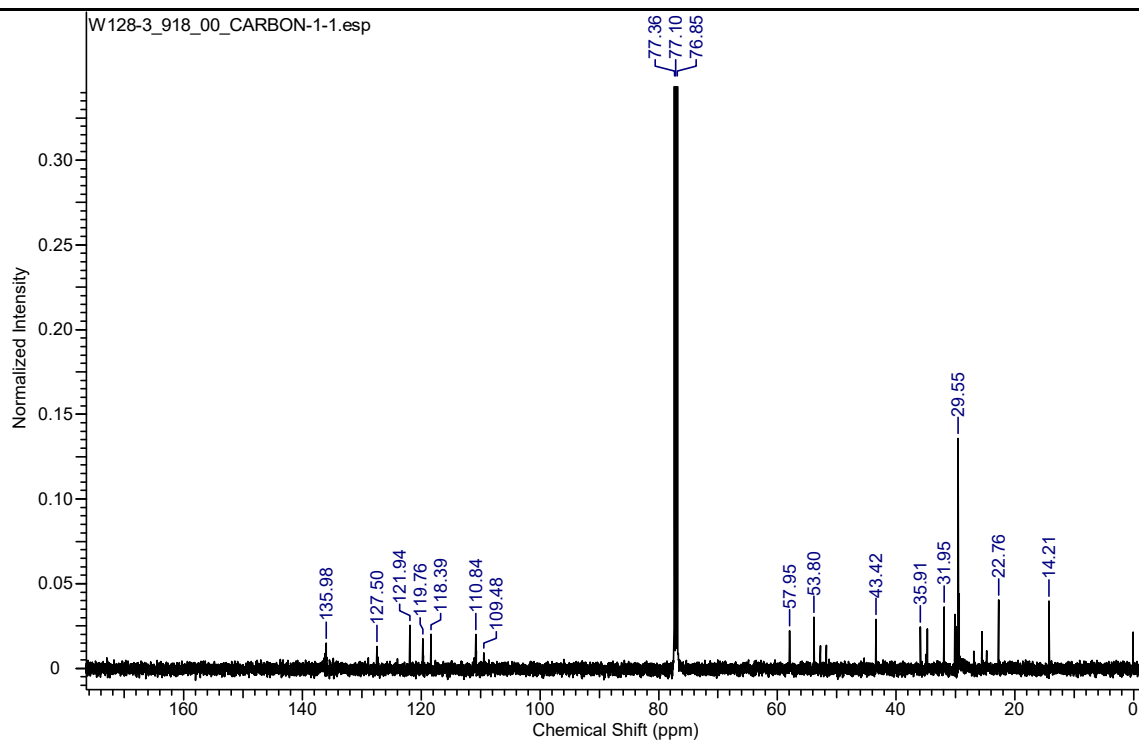

Due to fact that compound 7 was isolated as a mixture of racemic diastereomers on the  $^{13}\text{C}$  NMR spectra we can observe extra signals from minor diastereomer.
